# Supplementary material for: Laparoscopic versus open right hemicolectomy in colon carcinoma: A propensity score analysis of the DGAV StuDoQ|ColonCancer registry
Source: PLoS One. 2019 Jun 27;14(6):e0218829. doi: 10.1371/journal.pone.0218829 (PMC6597089; doi:10.1371/journal.pone.0218829)
Supplement: S1 Table — (XLSX) [file pone.0218829.s003.xlsx]

## Sheet: Sheet 1
last_name	first_name	titel	klinik	abteilung	PlzOrt	landLang
Ruppert	Reinhard	Dr. med.	Städt. Klinikum München GmbH, Klinikum Neuperlach	Klinik für Allgemein- und Viszeralchirurgie, Endokrine Chirurgie und Coloproktologie	81737 München	Deutschland
Mönch	Christian	PD Dr. Dr. habil.	Westpfalz-Klinikum Kaiserslautern	Klinik für Allgemein-, Viszeral- und Transplantationschirurgie	67655 Kaiserslautern	Deutschland
Anthuber	Matthias	Prof. Dr. med.	Klinikum Augsburg	Klinik für Allgemein-, Viszeral- und Transplantationschirurgie	86156 Augsburg	Deutschland
Zornig	Carsten	Prof. Dr.	Israelitisches Krankenhaus	Allgemein und Viszeralchirurgie	22297 Hamburg	Deutschland
Schneider	Berthold	Prof. Dr. med.	St. Marien-Hospital	Abteilung für Allgemein- und Viszeralchirurgie	53115 Bonn	Deutschland
Germer	Christoph-Thomas	Prof. Dr. med.	Universitätsklinik Würzburg	Klinik & Poliklinik für Allgemein-, Viszeral-, Gefäß- und Kinderchirurgie	97080 Würzburg	Deutschland
Coerper	Stephan	Prof. Dr. med.	Krankenhaus Martha-Maria	Klinik für Allgemeine-, Viszeral- und Gefäßchirurgie	90491 Nürnberg	Deutschland
Schumacher	Franz-Josef	Dr. med.	Katholische Kliniken Oberhausen	Klinik für Allgemein- und Viszeralchirurgie	46117 Oberhausen	Deutschland
Schwenk	Wolfgang	Prof. Dr.	Städtisches Klinikum Solingen gGmbH	Klinik für Allgemein- und Viszeralchirurgie	42653 Solingen	Deutschland
Vestweber	Karl-Heinz	Prof. Dr. med.	Klinikum Leverkusen	Klinik für Allgemein-, Visceral- und Thoraxchirurgie	51375 Leverkusen	Deutschland
Krummbein	Steffen	Dr. med.	Lukas Krankenhaus	Klinik für Allgemein-, Viszeral- und MIC	32257 Bünde	Deutschland
Ritz	Jörg-Peter	Prof. Dr. med.	Helios Kliniken Schwerin	Klinik für Allgemein- und Viszeralchirurgie	19055 Schwerin	Deutschland
Pistorius	Georg A.	Prof. Dr.	Klinikum am Bruderwald, Sozialstiftung Bamberg	Klinik für Allgemein-, Viszeral- und Thoraxchirurgie	96049 Bamberg	Deutschland
Jähne	Joachim	Prof. Dr.	Diakoniekrankenhaus Henriettenstiftung gGmbH	Allgemein- und Viszeralchirurgie	30171 Hannover	Deutschland
Runkel	Norbert	Prof. Dr. Dr. h. C.	Schwarzwald-Baar-Klinikum	Allgemein-, Viszeral- und Kinderchirurgie	78052 Villingen-Schwenningen	Deutschland
Richter	Axel	Prof. Dr. med.	Klinikum Hildesheim GmbH	Klinik für Allgemein-, Viszeral-, Gefäß- und Thoraxchirurgie	31135 Hildesheim	Deutschland
Keßler	Ulrich	Dr. med.	Oberlausitz Kliniken GmbH	Chirurgie	02625 Bautzen	Deutschland
Farkas	Stefan	Prof. Dr. med.	St.-Josefs-Hospital Wiesbaden	Klinik für Allgemein- und Visceralchirurgie	65189 Wiesbaden	Deutschland
Grambach	Konrad	Dr.	Elisabeth Krankenhaus	Chirurgie	49832 Thuine	Deutschland
Schiedeck	Thomas	Prof. Dr. med.	Klinikum Ludwigsburg	Klinik für Allgemein- und Viszeralchirurgie	71640 Ludwigsburg	Deutschland
Mellert	Joachim	Prof. Dr. med.	St. Ansgar-Krankenhaus	Abteilung für Allgemein-, Viszeral- und Gefäßchirurgie	37671 Höxter	Deutschland
Schmid	Michael	Dr.	Westpfalz Klinikum Kirchheimbolanden	Chirurgie	67292 Kirchheimbolanden	Deutschland
Zuz	Gerhard	Dr. med.	St. Elisabeth-Krankenhaus	Chirurgische Abteilung I	04277 Leipzig	Deutschland
Post	Stefan	Prof. Dr.	Universitätsmedizin Mannheim	Chirurgische Klinik	68167 Mannheim	Deutschland
Schmidt	Christoph	Dr. med.	Krankenhaus St. Josef	Abteilung für Allgemein- und Viszeralchirurgie	97421 Schweinfurt	Deutschland
Strandborg	Johann	Dr. med.	Ubbo-Emmius-Klinik Aurich	Chirurgie	26603 Aurich	Deutschland
Friedrich	Jürgen	Dr. med.	Kathohlische Kliniken Ruhrhalbinsel, St. Josef Krankenahus Kupferdreh	Abteilung für Allgemein- und Viszeralchirurgie	45257 Essen	Deutschland
Hanisch	Ernst	Prof. Dr.	Asklepios Kliniken Langen	Chirurgie	63225 Langen-Seligenstadt	Deutschland
Lauschke	Holger	PD Dr.	Malteser Krkhs St. Anna	Chirurgie	47259 Duisburg	Deutschland
Roder	Jürgen	Prof. Dr. med.	Kreiskliniken Altötting-Burghausen	Klinik für Allgemein-, Viszeral- und Thoraxchirurgie	84503 Altötting	Deutschland
Lammers	Bernhard J.	Dr. med.	Lukaskrankenhaus	Coloproktologie und Hernienchirurgie	41464 Neuss	Deutschland
Hartung	Guido	Dr. med.	Sana Klinikum Remscheid	Klinik für Allgemein-, Viszeral- und minimal invasive Chirurgie	42859 Remscheid	Deutschland
Stier	Albrecht	Prof. Dr. med.	Helios-Klinik Erfurt	Klinik für Allgemein- und Viszeralchirurgie	99089 Erfurt	Deutschland
Zarras	Konstantinos	Dr. med.	Marien Hospital	Klinik für Viszeral-, Minimalinvasive und Onkologische Chirurgie	40479 Düsseldorf	Deutschland
Kroesen	Anton J.	Prof. Dr. med.	Krankenhaus Porz am Rhein	Klinik für Allgemein-, Viszeral- und Unfallchirurgie	51149 Köln	Deutschland
Isbert	Christoph	Prof. Dr. med.	Klinik für Allgemein-, Viszeral- und kolopr. Chirurgie	Ev. Malie Sieveking-Krankehaus gGmbH	22359 Hamburg	Deutschland
Kreissler-Haag	Dorit	Dr. med.	Marienhausklinik St. Josef Kohlhof	Chirurgische Klinik	66539 Neunkirchen	Deutschland
Schmidt	Johannes	Prof. Dr. med.	Krankenhaus Landshut-Achdorf	Chirurgische Klinik I	84036 Landshut	Deutschland
Soetje	Ulrike	Dr. med.	St. Josefs-Hospital	Abteilung für Koloproktologie	65189 Wiesbaden	Deutschland
Manger	Regina	Dr.	Wertachklinik Schwabmünchen	Chirurgie	86830 Schwabmünchen	Deutschland
Said	Samir	Prof. Dr. med.	Gemeinschaftsklinikum Mittelrhein Ev. Stift St. Martin	Klinik für Allgemein- und Viszeralchirurgie	56068 Koblenz	Deutschland
Renter	Marc Alexander	Dr. med.	St. Josef Krankenhaus Moers GmbH	Abteilung für Allgemein- und Viszeralchirurgie, Proktologie	47441 Moers	Deutschland
Ebert	Karl-Heinz	Dr. med.	St. Martinus-Hospital	Chirurgische Klinik - Allgemein- und Viszeralchirurgie	57462 Olpe	Deutschland
Fackeldey	Volker	Dr.	Klinik Kitzinger Land	Chirurgie	97318 Kitzingen	Deutschland
Glanemann	Matthias	Prof. Dr. med.	Universitätsklinikum des Saarlandes	Klinik für Allgemein-, Viszeral-, Gefäß- und Kinderchirurgie	66421 Homburg an der Saar	Deutschland
Meyer	Alexander	Dr. med.	Johanniter Krankenhaus Rheinhausen	Klinik für Allgemein-, Viszeral- und Gefäßchirurgie und Koloproktologie	47228 Duisburg	Deutschland
Häring	Rudolf	Dr. med.	RKK-Klinikum St. Josefs-Krankenhaus	Klinik für Allgemein-, Viszeral- und Gefäßchirurgie	79104 Freiburg im Breisgau	Deutschland
Mann	Benno	PD Dr. med.	Augusta Krankenanstalt	Allgemein- und Viszeralchirurgie	44791 Bochum	Deutschland
Drummer	Bernhard	Dr. med.	Klinikum Forchheim	Allgemeinchirurgische Abteilung	91301 Forchheim	Deutschland
Brütting	Alfred	Dr. med.	Waldkrankenhaus St. Marien	Chirurgische Klinik	91054 Erlangen	Deutschland
Roblick	Uwe Johannes	PD Dr. Dr. med.	Agaplesion Diakonieklinikum Hamburg	Allgemein-, Viszeral- und minimalinvasive Chirurgie	20259 Hamburg	Deutschland
Rudolph	Hagen	Dr. med.	Klinikum Chemnitz gGmbH	Klinik für Allgemein- und Viszeralchirurgie	09116 Chemnitz	Deutschland
Helfritzsch	Herry	Dr. med.	Thüringen-Kliniken "Georgius Agricola" GmbH, Standort Saalfeld	Klinik für Allgemein- und Viszeralchirurgie	07318 Saalfeld	Deutschland
Schreier	Konrad	Dr. med.	Ilm-Kreis-Kliniken	Allgemein- und Viszeralchirurgie	99310 Arnstadt	Deutschland
Hosch	Stefan	Prof. Dr. med.	Klinikum Ingolstadt		85049 Ingolstadt	Deutschland
Crescenti	Fabio	Dr. med.	Aller-Weser-Klini gGmbH, Krankenhaus Verden	Allgemein-, Viszeral- und minimal invasive Chirurgie	27283 Verden	Deutschland
Kirchner	Tom G.	Dr. med.	Klinik für MIC Berlin-Zehlendorf	Zentrum für Koloproktologie und Beckenbodentherapie	14129 Berlin	Deutschland
Konrad	Georg	Dr.	Waldkrankenhaus	Klinik für Allgemein- und Viszeralchirurgie	07607 Eisenberg	Deutschland
Horstmann	Rüdiger	Prof. Dr. med.	Herz-Jesu-Krankenhaus Münster-Hiltrup	Abteilung für Allgemein-, Viszeral- und Gefäßchirurgie	48165 Münster	Deutschland
Hessler	Christian	Dr. med.	Heilig-Geist-Hospital	Allgemein-, und Viszeralchirurgie, Proktologie, MIC	55411 Bingen	Deutschland
Hanke	Sigurd	Dr. med.	Kreiskrankenhaus Delitzsch GmbH, Standort Eilenburg	Chirurgische Klinik	04838 Eilenburg	Deutschland
Junghans	Tido	Prof. Dr. med.	Klinikum Bremerhaven Reinkenheide gGmbH	Klinik für Allgemein-, Viszeral-, Thorax- und Gefäßchirurgie	27574 Bremerhaven	Deutschland
Biermann	Lothar	Dr. med.	Klinikum Stadt Soest	Klinik für Allgemein- und Viszeralchirurgie	59494 Soest	Deutschland
Hanisch	Robert	Dr. med.	DRK-Klinikum Westerwald	Abteilung für Allgemein- und Viszeralchirurgie	57610 Altenkirchen	Deutschland
Werner	Uwe	Dr. med.	Mühlenkreiskliniken Krankenhaus Lübbecke		32312 Lübbecke	Deutschland
Löhe	Florian	Prof. Dr. med.	Klinikum Landshut gGmbH	Chirurgische Klinik I	84034 Landshut	Deutschland
Tschmelitsch	Jörg	Prof. Dr. med.	Barmherzige Brüder St. Veit	Chirurgie	9300 St. Veit	Österreich
Klinnert	Jochen	Dr. med.	Asklepios Klinik Parchim	Abteilung für Allgemein- und Viszeralchirurgie	19370 Parchim	Deutschland
Krieglstein	Christian F.	Prof. Dr. med.	Elisabeth Krankenhaus Köln-Hohenlind	Klinik für Chirurgie	50935 Köln	Deutschland
Schimmelpenning	Hendrik	Prof. Dr. med.	Schön Klinik Neustadt	Klinik für Allgemein-, Viszeral- und Gefäßchirurgie	23730 Neustadt	Deutschland
Kalff	Jörg C.	Prof. Dr. med.	Universitätsklinikum Bonn	Abteilung für Viszerale/kolorektale Chirurgie und Proktologie	53127 Bonn	Deutschland
Schneider	Claus	Dr. med.	Marienhausklinikum St. Elisabeth	Allgemein-, Viszeral- und Gefäßchirurgie	56564 Neuwied	Deutschland
Morkramer	Rolf	Dr. med.	St.-Josef-Hospital Xanten	Allgemein-, Viszeral- und Minimalinvasive Chirurgie	46509 Xanten	Deutschland
Tietze	Markus	Dr. med.	Kreisklinik Mindelheim	Allgemein-, Viszeral- und Minimalinvasive Chirurgie	87719 Mindelheim	Deutschland
Tröbs	Ute	Dr. med.	KKH Delitzsch GmbH	Abteilung für Allgemein- und Viszeralchirurgie	04509 Delitzsch	Deutschland
Brunk	Albrecht	Dr. med.	Saale-Unstrut-Klinikum	Klinik für Allgemein- und Viszeralchirurgie	06618 Naumburg	Deutschland
